# Supplementary material
Source: publisher site journal article supplement (https://www.dovepress.com/article/212381)
Supplement: Supplementary file 1 [file get_supplementary_file.php]

| Supplementary Table 1: Updated ADO regression coefficients and assignment of points for the score | | | | | | | |
| --- | --- | --- | --- | --- | --- | --- | --- |
| Points | Regression Coefficients | 0 | 2 | 3 | 4 | 5 | 7 |
| Age (in years) | 0.0703 | 40 - 49 | 50 - 59 |  | 60 - 69 | 70 - 79 | ≥80 |
| Dyspnoea (mMRC) | 0.2585 | 0 | 3 | 4 |  |  |  |
| FEV1% predicted | −0.0288 | ≥81 | 51 - 64 | 36 - 50 | ≤35 |  |  |

| Supplementary Table 2: Sensitivity analysis of accuracy measures in complete cases and prevalent cases | | | |
| --- | --- | --- | --- |
|  | Prevalent Cases (N= 1,562) | Whole sample  (N= 1892) | Complete Case (1,701)* |
| **1-year mortality** |  |  |  |
| No. of events | 34 | 37 | 28 |
| AUC  (95% CI) | 0.721  (0.657 to 0.786) | 0.728  (0.661 to 0.796) | 0.717  (0.639 to 0.795) |
| Calibration  slope (95% CI) | 0.808  (0.434 to 1.182) | 0.794  (0.454 to 1.134) | 0.727  (0.349 to 1.105) |
| **2-year mortality** |  |  |  |
| No. of events | 86 | 93 | 76 |
| AUC  (95% CI) | 0.712  (0.660 to 0.764) | 0.718  (0.666 to 0.760) | 0.723  (0.669 to 0.784) |
| Calibration  slope (95% CI) | 0.803  (0.559 to 1.046) | 0.789  (0.567 to 1.012) | 0.807  (0.566 tot 1.048) |
| **3-year mortality** |  |  |  |
| No. of events | 98 | 98 | 124 |
| AUC  (95% CI) | 0.738  (0.690 to 0.786) | 0.738  (0.690 to 0.786) | 0.773  (0.723 to 0.822) |
| Calibration  slope (95% CI) | 0.945  (0.698 to 1.192) | 0.945  (0.698 to 1.192) | 1.08  (0.801 to 1.361) |
| *Only cases with complete dyspnoea and obstruction measurements. | | | |
